# Supplementary material for: Collective geographical eco-regions and precursor sources driving Arctic new particle formation
Source: Copernicus journal article supplement (doi:10.5194/acp-2022-280), 2022-05-03
Supplement: Supplementary file 1 [file acp-2022-280-supplement.pdf]

# **SUPPLEMENTARY INFORMATION FOR:**

## **Collective geographical eco-regions and precursor sources driving Arctic new particle formation**

James Brean<sup>1</sup>, David C.S. Beddows<sup>1</sup>, Roy. M. Harrison<sup>1&</sup>, Congbo Song<sup>1</sup>, Peter Tunved<sup>2</sup>, Johan Ström<sup>2</sup>, Radovan Krejci<sup>2</sup>, Eyal Freud<sup>2</sup>, Andreas Massling<sup>3</sup>, Henrik Skov<sup>3</sup>, Eija Asmi<sup>4</sup>, Angelo Lupi<sup>5</sup> and Manuel Dall'Osto<sup>6</sup>

<sup>1</sup>Division of Environmental Health & Risk Management School of Geography, Earth & Environmental Sciences University of Birmingham, Edgbaston, Birmingham, B15 2TT, United Kingdom

<sup>2</sup>Department of Environmental Science & Bolin Centre of Climate Research, Stockholm University, Stockholm 10691, Sweden

<sup>3</sup>Interdisciplinary Centre for Climate Change (iClimate), Department of Environmental Science, Aarhus University, Roskilde 4000, Denmark

<sup>4</sup>Atmospheric Composition Research, Finnish Meteorological Institute, Helsinki, Finland

<sup>5</sup>Institute of Polar Science, CNR, Bologna, Italy

<sup>6</sup>Institute of Marine Science, Consejo Superior de Investigaciones Científicas (CSIC), Barcelona, Spain

<sup>&</sup>Also at: Department of Environmental Sciences / Center of Excellence in Environmental Studies, King Abdulaziz University, PO Box 80203, Jeddah, 21589, Saudi Arabia

*Correspondence to:* M.D.O: dallosto@icm.csic.es; J.B: j.brean@bham.ac.uk

**Table S1: List of sampling sites and NPF events (689 in total). We separate sites into “types” based upon the classification given by Schmale et al., (2021).**

| Site                    | Lat  | Lon    | Elevation a.s.l (m) | Type        | Number of NPF events |
|-------------------------|------|--------|---------------------|-------------|----------------------|
| <b>Alert (ALE)</b>      | 82.5 | -62.3  | 210                 | Archipelago | 20                   |
| <b>Nord (VRS)</b>       | 81.6 | -16.7  | 24                  | Greenland   | 64                   |
| <b>Gruvebadet (GRU)</b> | 78.9 | 11.9   | 67                  | Svalbard    | 155                  |
| <b>Zeppelin (ZEP)</b>   | 78.9 | 11.9   | 474                 | Svalbard    | 251                  |
| <b>Barrow (BAR)</b>     | 71.3 | -156.6 | 5                   | Continental | 31                   |
| <b>Tiksi (TIK)</b>      | 71.6 | 128.9  | 35                  | Continental | 168                  |

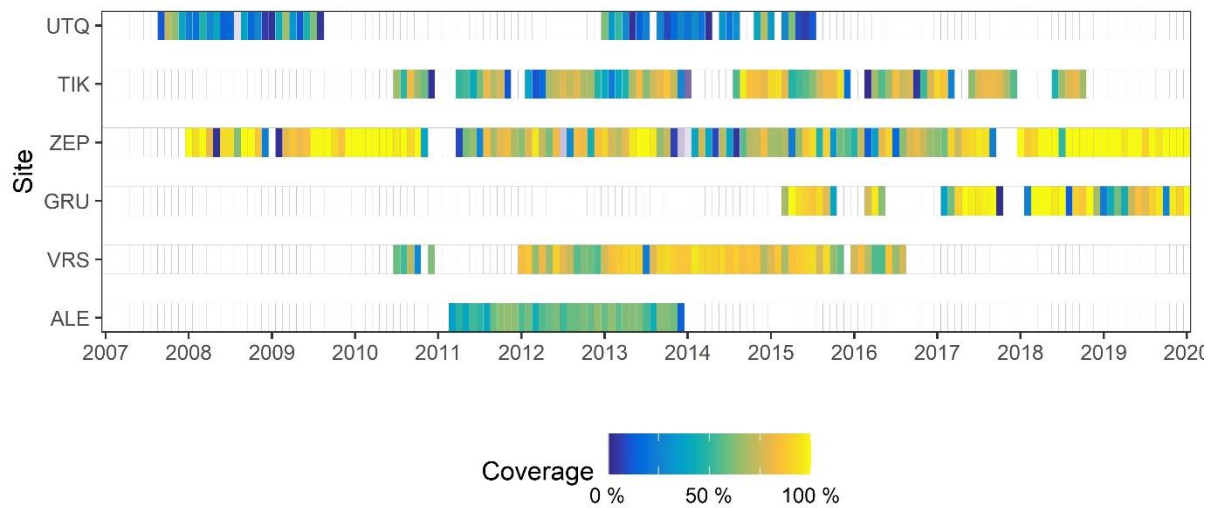

**Figure S1: Data coverage for each of the sites. Each individual cell corresponds to one full month of measurements. Fill colour corresponds to the total number of available hourly data as a percentage of the total hours within that month.**

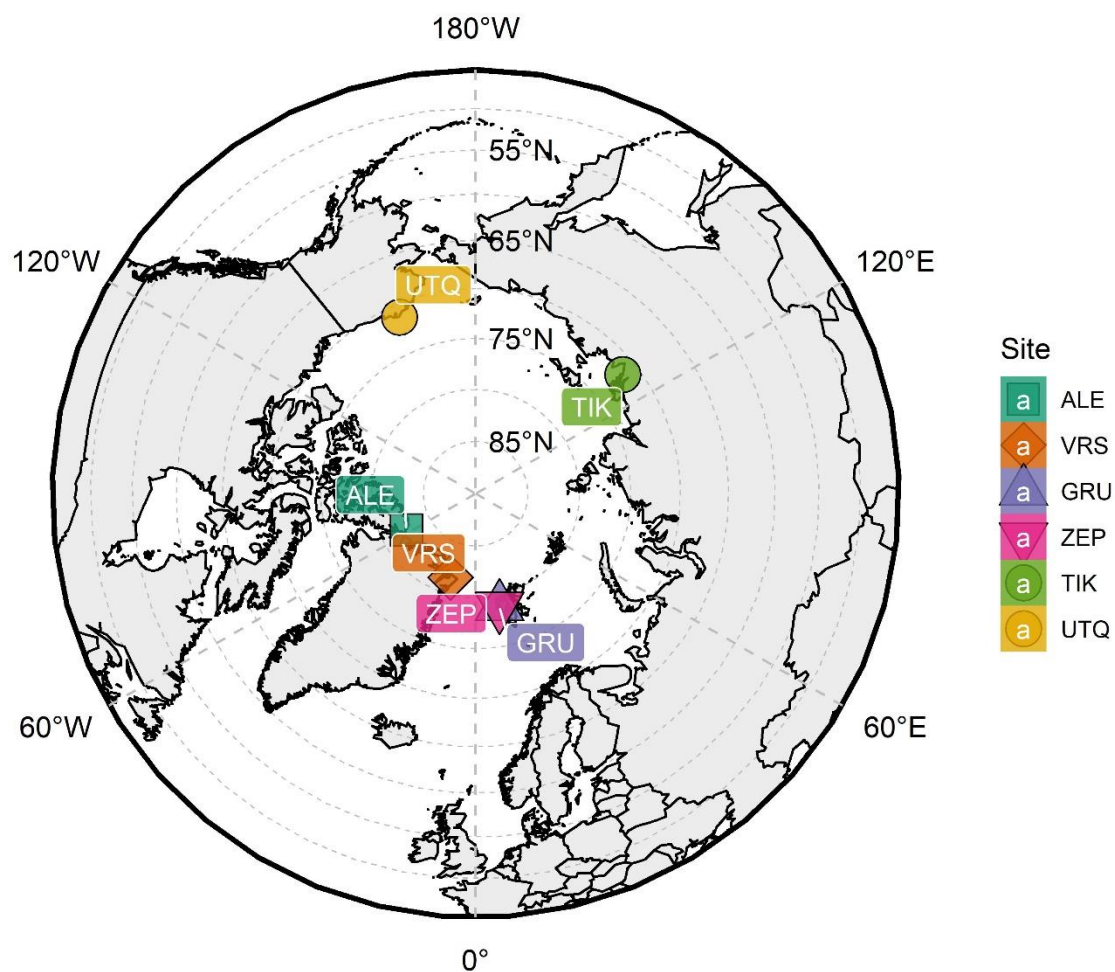

Figure S2: Location of each of the Arctic measurement sites

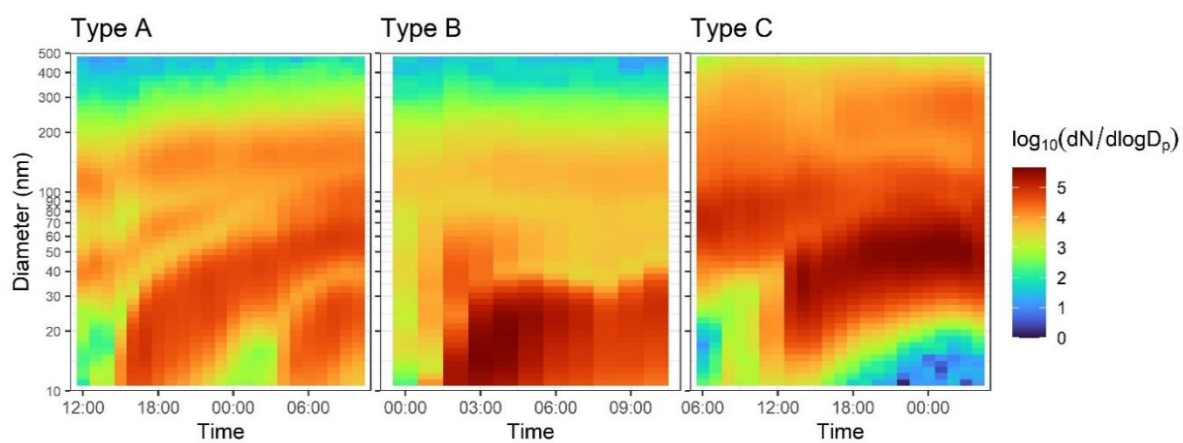

Figure S3: Example type A, type B, and type C new particle formation events at the TIK site

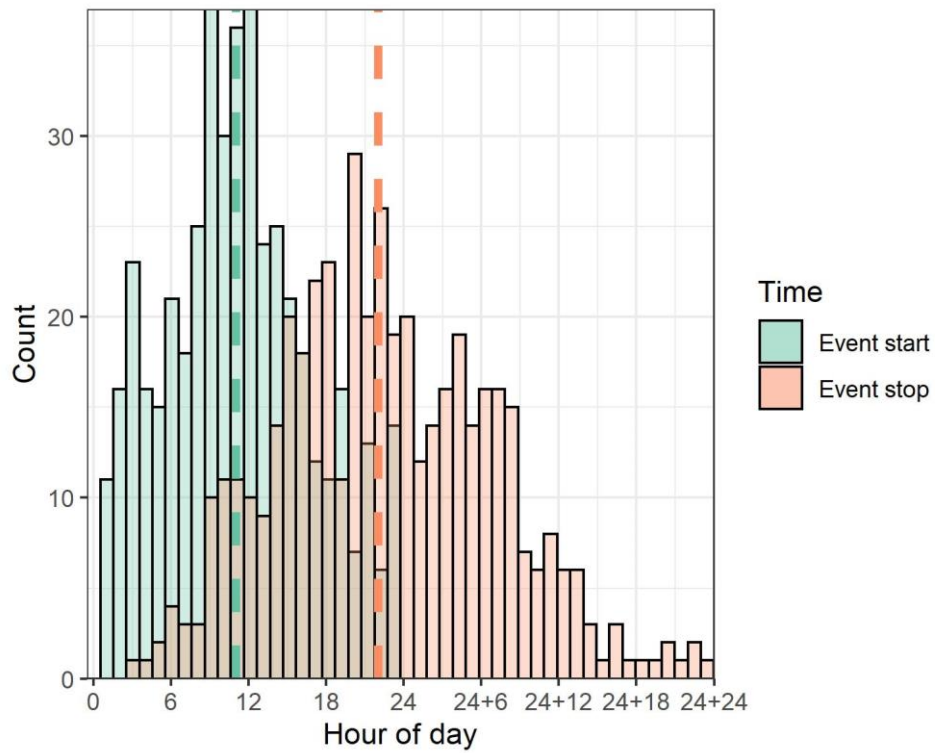

**Figure S4: Average hour of day for the beginning/end of measured NPF event. Dashed lines represent median start and stop times respectively. Labels stating 24+X represent events that continue past the 24<sup>th</sup> hour of the day on which the event begins.**

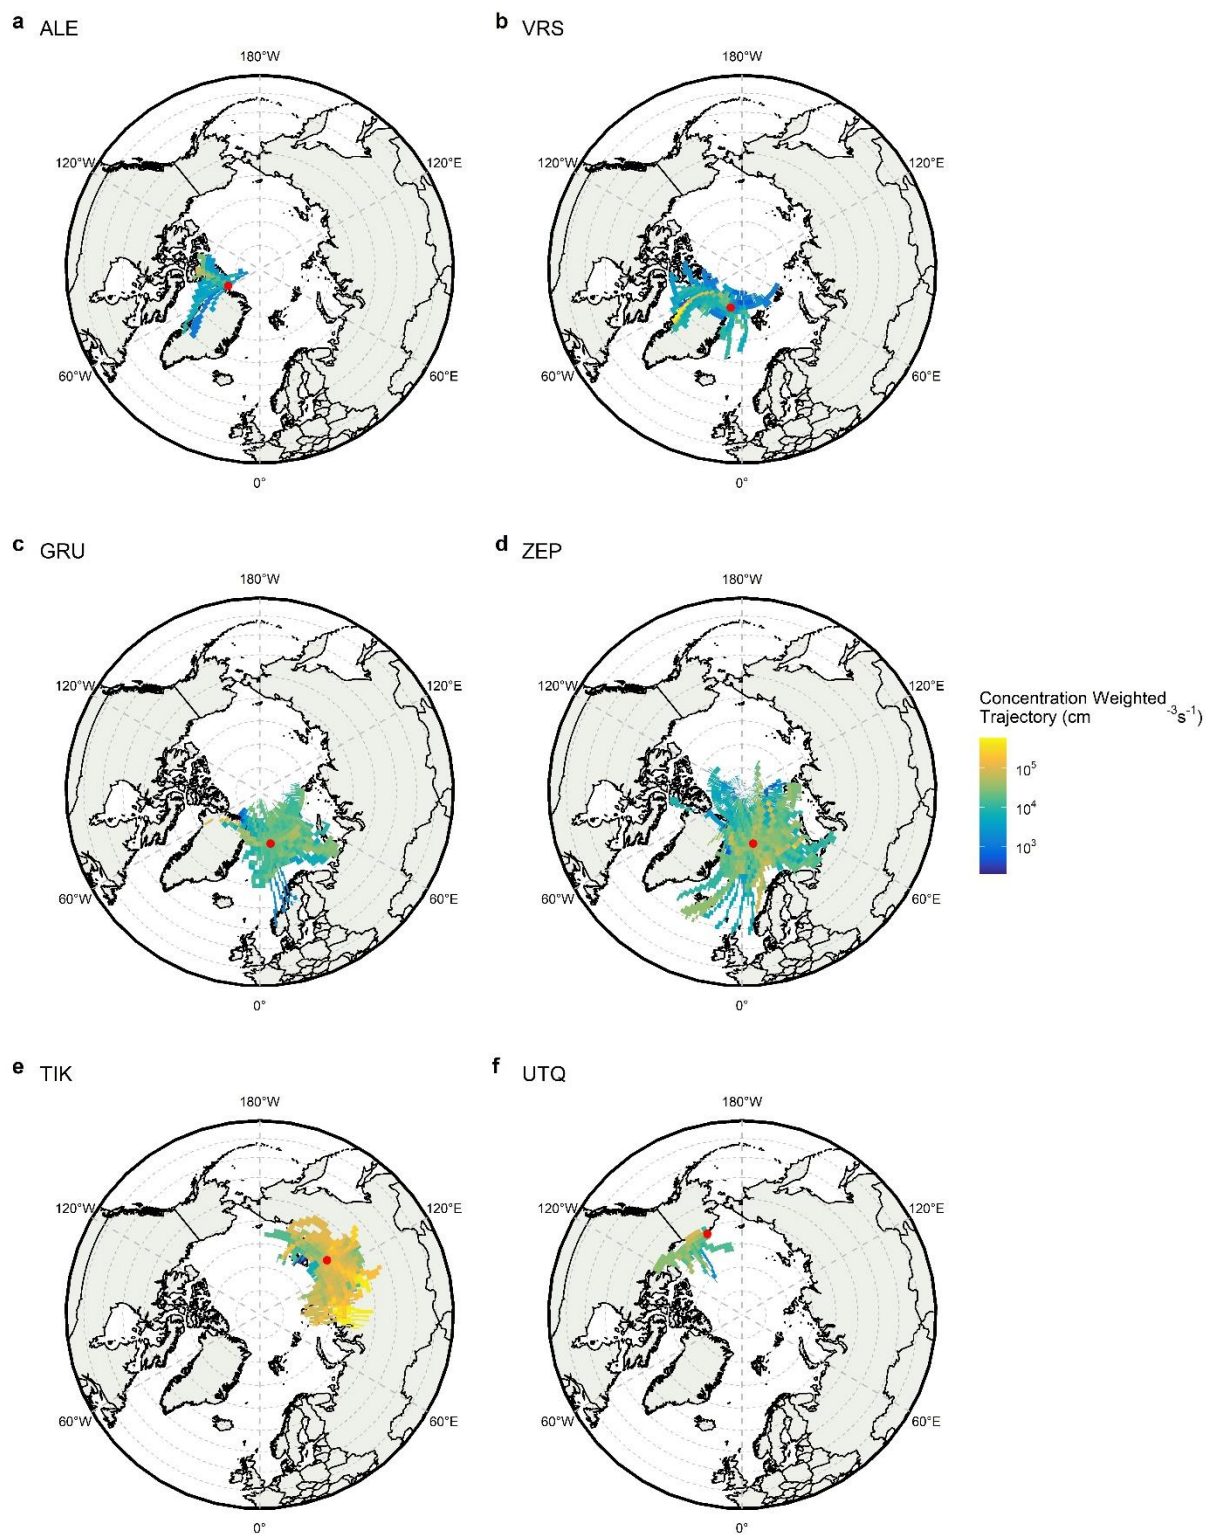

**Figure S5.** 72-hour back trajectories plotted on a 1° by 1° grid, weighted by the source rate of equivalent sulphuric acid vapour driving particle growth, for (a) ALE, (b) VRS, (c) GRU, (d) ZEP, (e) TIK, and (f) UTQ.
